# Supplementary material for: Systematic analysis of copy number variants of a large cohort of orofacial cleft patients identifies candidate genes for orofacial clefts
Source: PubMed Central journal article supplement (PMC4698300; doi:10.1007/s00439-015-1606-x), 2015-11-11

**a**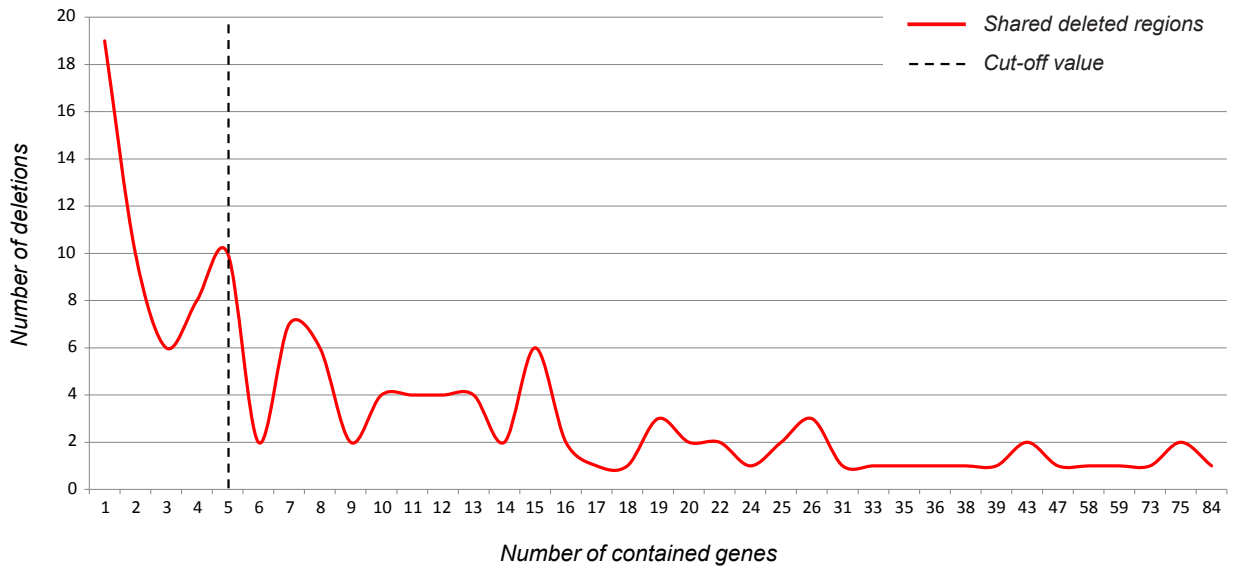**b**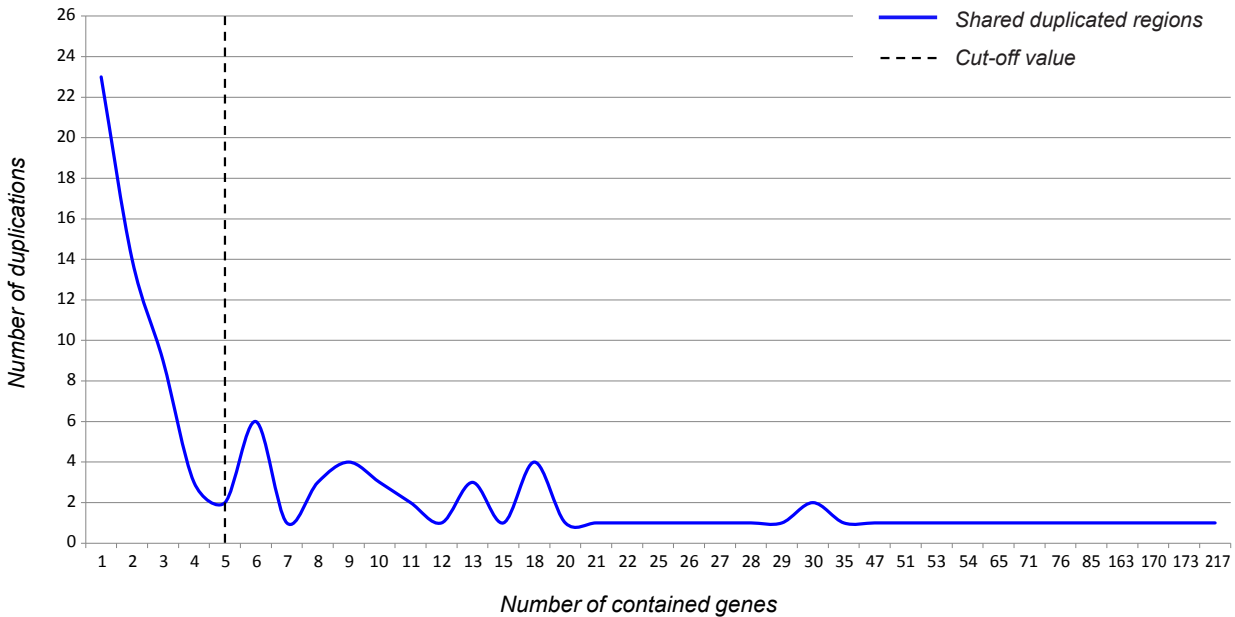

mean = 1.771768

Threshold:  $10^{1.77} = 59.13$  nRPK

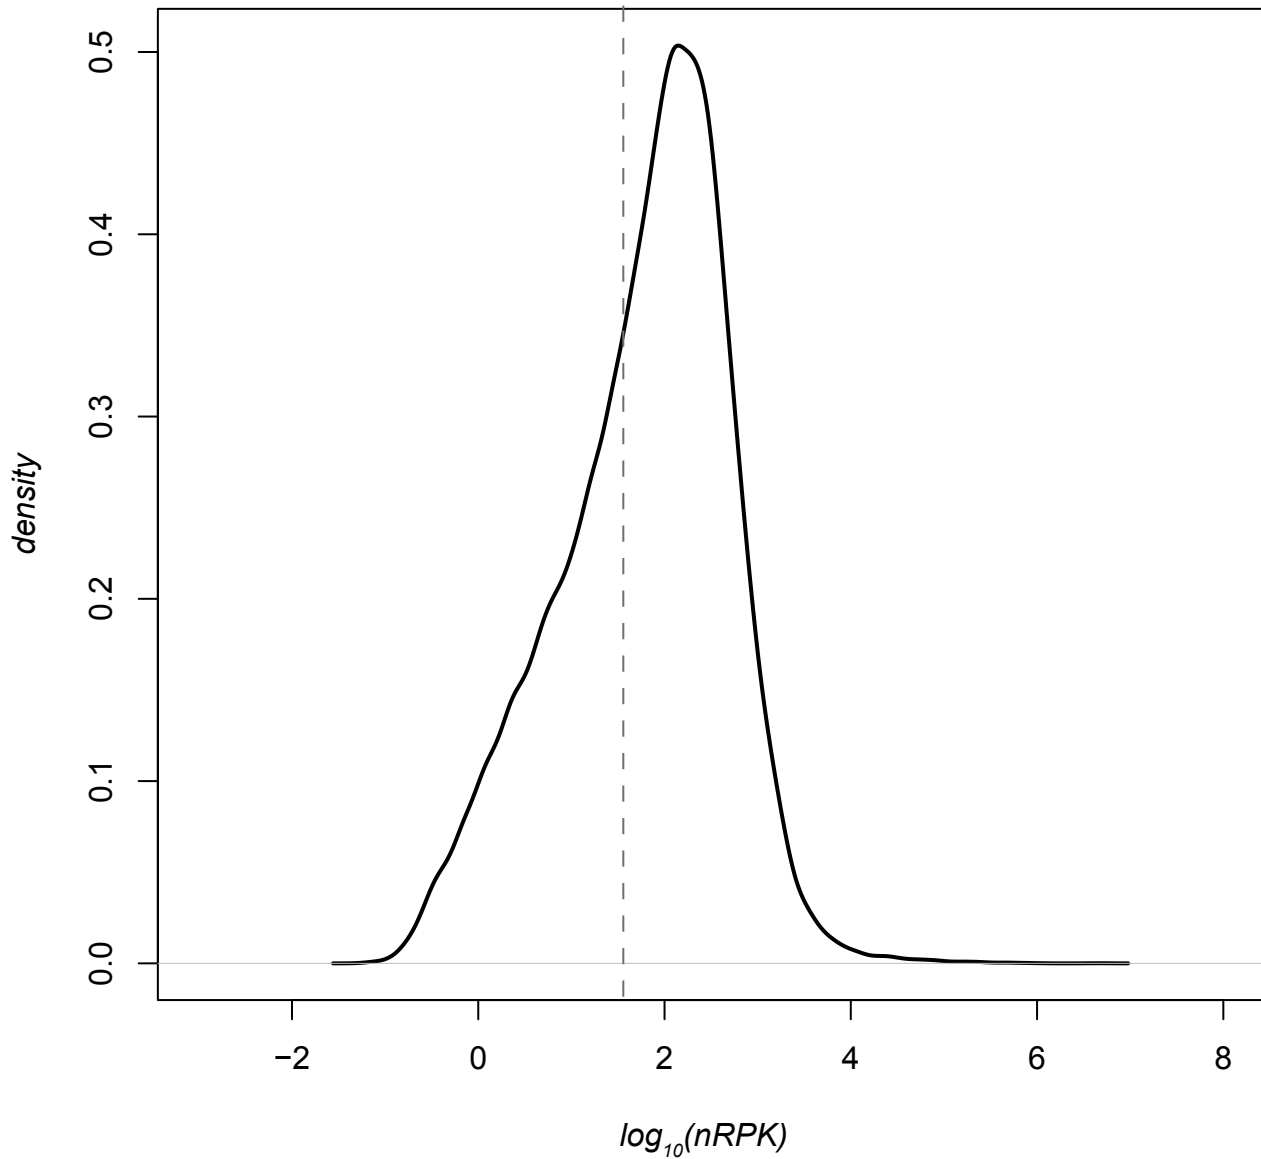

Supplement: 439_2015_1606_MOESM2_ESM.pdf [file 439_2015_1606_MOESM2_ESM.pdf]
